# Supplementary material for: Inhibitory effect of hydrophobic fullerenes on the β-sheet-rich oligomers of a hydrophilic GNNQQNY peptide revealed by atomistic simulations
Source: Royal Society of Chemistry journal article supplement (doi:10.1039/c6ra27608c), 2017-01-01
Supplement: c6ra27608c1.pdf [file c6ra27608c1.pdf]

## Supplementary Information

Inhibitory effect of hydrophobic fullerenes on the  $\beta$ -sheet-rich oligomers of hydrophilic GNNQQNY peptide revealed by atomistic simulations

Jiangtao Lei, Ruxi Qi, Luogang Xie, Wenhui Xi and Guanghong Wei\*

State Key Laboratory of Surface Physics, Key Laboratory for Computational Physical Sciences (Ministry of Education), and Department of Physics, Fudan University, 220 Handan Road, Shanghai, 200433, China

**This material contains six supplemental figures.**

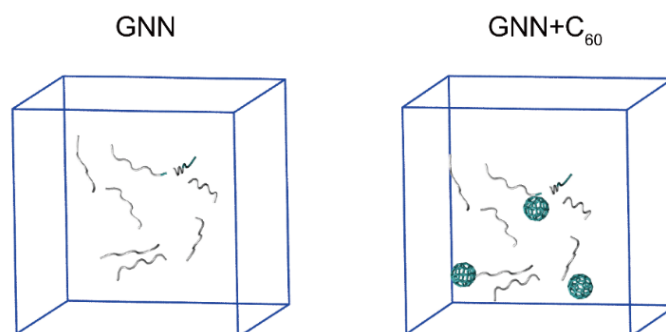

**Figure S1.** The initiating state for the GNN and GNN+C<sub>60</sub> systems.

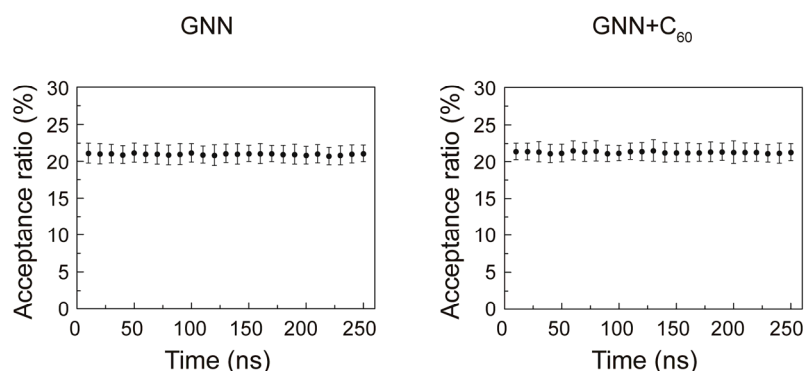

**Figure S2.** Average acceptance ratio of the REMD simulation for the GNN and GNN+C<sub>60</sub> systems. The acceptance ratios are  $\sim 21\%$  for both GNN and GNN+C<sub>60</sub> systems.

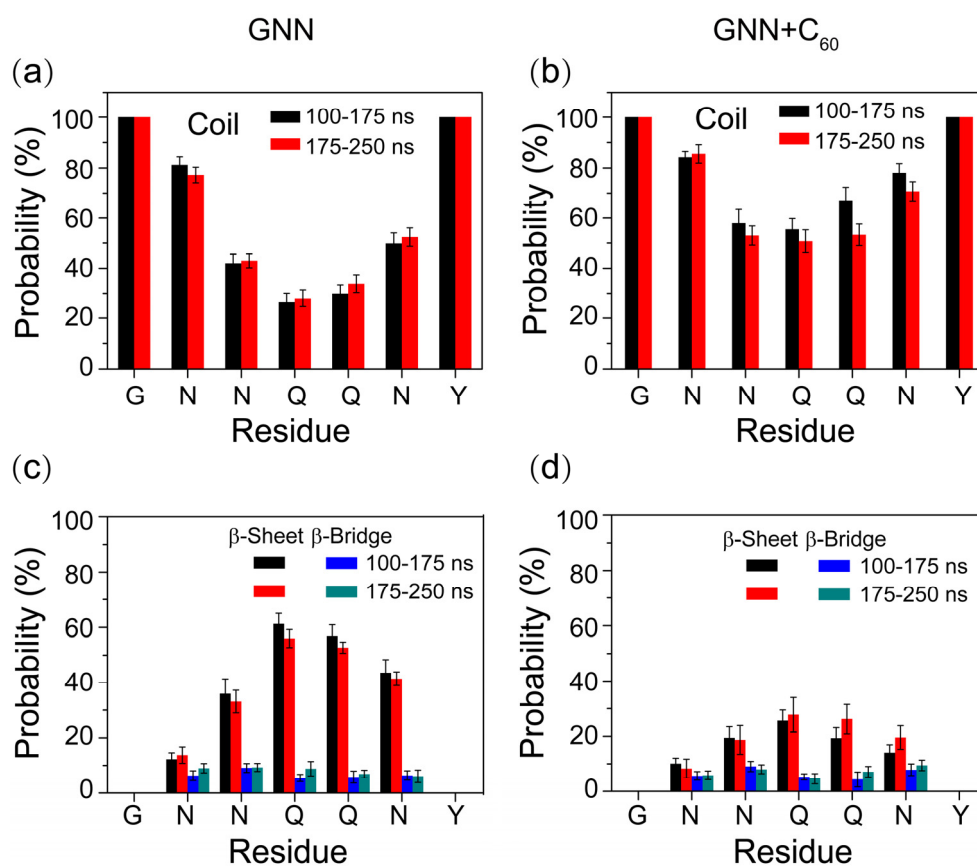

**Figure S3.** Secondary structure (coil (a, b),  $\beta$ -sheet and  $\beta$ -bridge (c, d)) probability of each residue calculated using the 100-175 ns and 175-250 ns REMD data for GNN and GNN+C<sub>60</sub> systems.

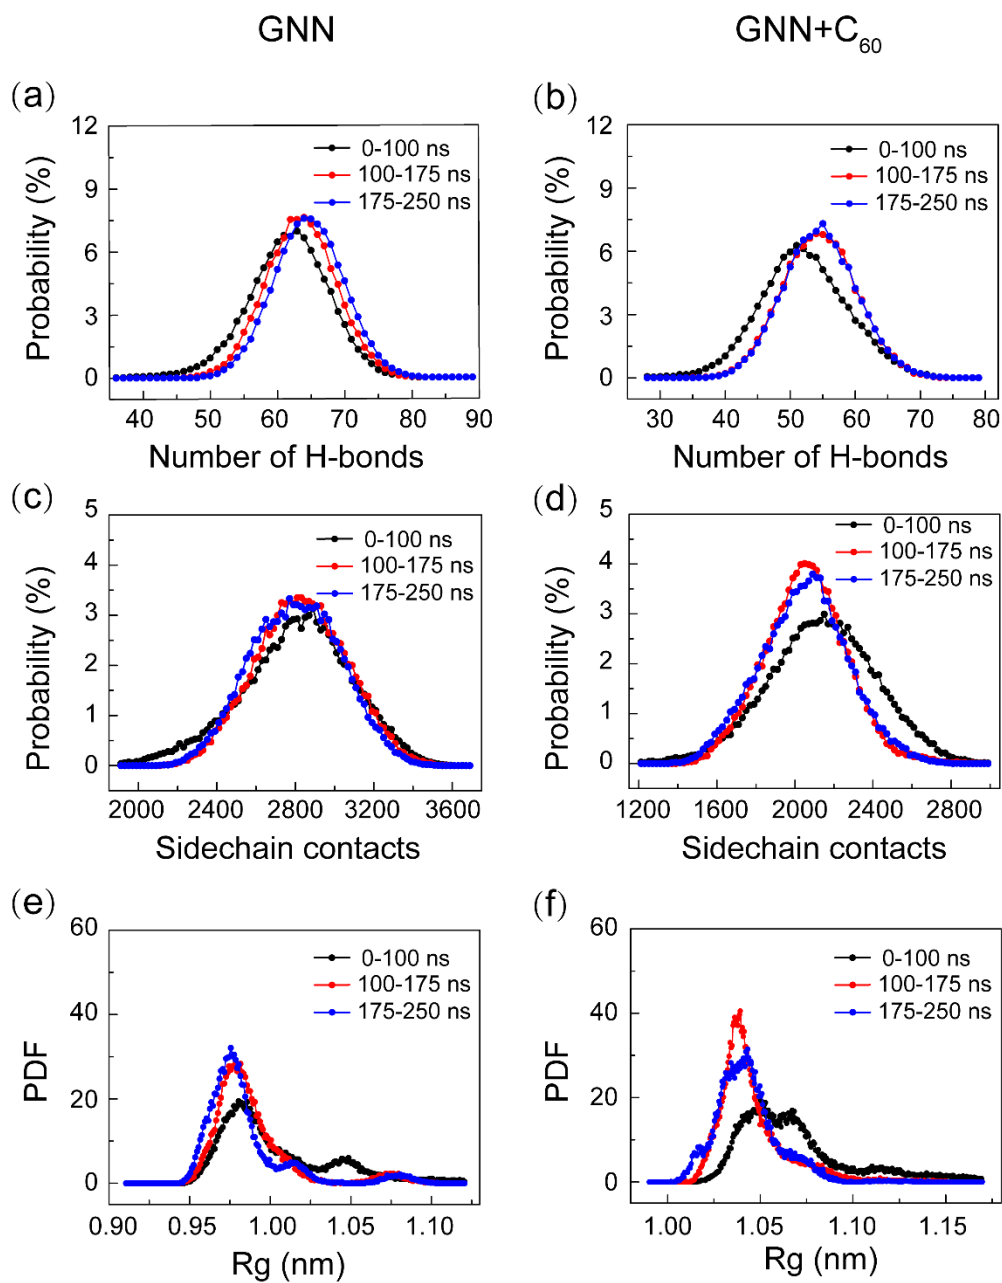

**Figure S4.** The distribution of total number of H-bonds (a, b), sidechain contact number (c, d) and radius of gyration (e, f) of the octamers within two different time intervals using the 150-200 ns and 200-250 ns data for GNN and GNN+C<sub>60</sub> systems. For comparison, we also added the results using the first 100 ns data.

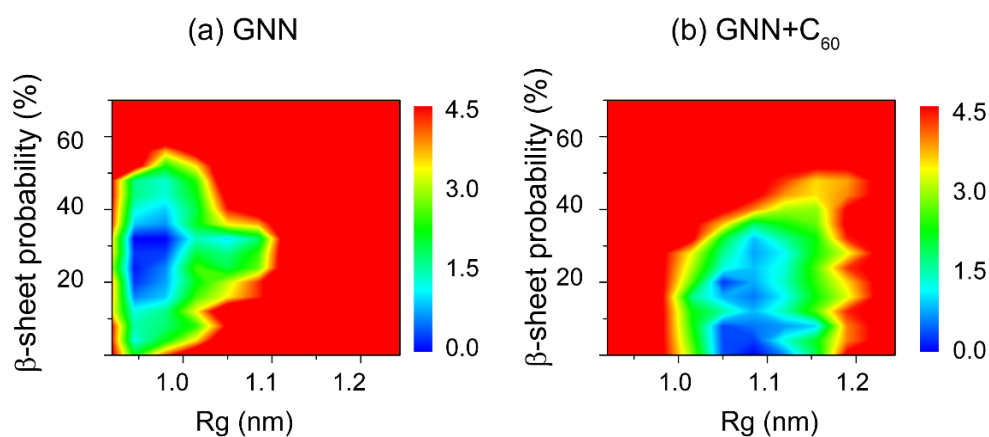

**Figure S5.** Potential of mean force (PMF) of GNNQQNY octamers in the absence and presence of fullerenes. The PMF (in kcal/mol) was plotted as a function of Rg and  $\beta$ -sheet probability of GNNQQNY octamer in GNN (a) and GNN+C<sub>60</sub> (b) systems.

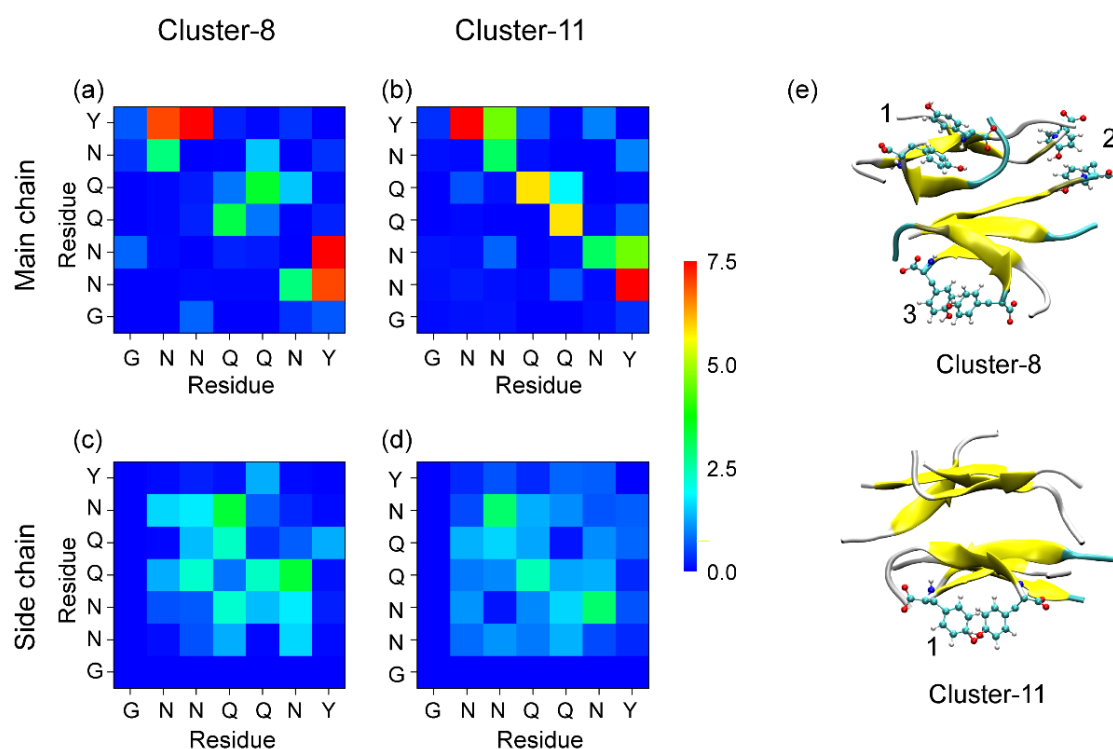

**Figure S6.** Structural analyses of the conformations in Cluster-8 and Cluster-11. Main-chain - main-chain and side-chain - side-chain H-bond formation probability for Cluster-8 (a, c) and Cluster-11 (b, d). (e) The snapshots of the center structures in the two clusters. Residues Tyr that display  $\pi$ - $\pi$  stacking interactions are shown in ball-and-stick representation.
